# Supplementary material
Source: publisher figshare collection journal article supplement (https://acs.figshare.com/ndownloader/files/35239440)
Supplement: Supplementary file 1 [file 35239440]

## Supporting Information for

# Low-Temperature Synthesis of Boron Nitride as a Large-Scale Passivation and Protection Layer for 2D Materials and High-Performance Devices

Zhanjie Lu<sup>1</sup>, Meijie Zhu<sup>1</sup>, Yifan Liu<sup>2</sup>, Gehui Zhang<sup>1</sup>, Zuoquan Tan<sup>1</sup>, Xiaotian Li<sup>3</sup>, Shuaishuai Xu<sup>4</sup>, Le Wang<sup>1</sup>, Ruifen Dou<sup>3</sup>, Bin Wang<sup>4</sup>, Yuan Yao<sup>5</sup>, Zhiyong Zhang<sup>2</sup>, Jichen Dong<sup>6</sup>, Zhihai Cheng<sup>1\*</sup> and Shanshan Chen<sup>1\*</sup>

- <sup>1.</sup> Department of Physics and Beijing Key Laboratory of Optoelectronic Functional Natural Materials and Micro-nano Devices, Renmin University of China, Beijing 100872, People's Republic of China
- <sup>2.</sup> Key Laboratory for the Physics and Chemistry of Nanodevices and Center for Carbon-based Electronics, Peking University, Beijing, 100871, China
- <sup>3.</sup> Department of Physics, Beijing Normal University, Beijing, 100875, P. R. China
- <sup>4.</sup> Key Laboratory of Nanosystem and Hierarchical Fabrication, National Center for Nanoscience and Technology, Beijing 100190, China
- <sup>5.</sup> Beijing National Laboratory for Condensed Matter Physics, Institute of Physics, Chinese Academy of Sciences, Beijing 100190, China
- <sup>6.</sup> Institute of Chemistry, Chinese Academy of Sciences, Beijing 100190, China

**\*E-mail:** [schen@ruc.edu.cn](mailto:schen@ruc.edu.cn) and [zhihaicheng@ruc.edu.cn](mailto:zhihaicheng@ruc.edu.cn)

**S1. The effect of AB heating temperature on the growth of BN on 2DMs at low temperature.**

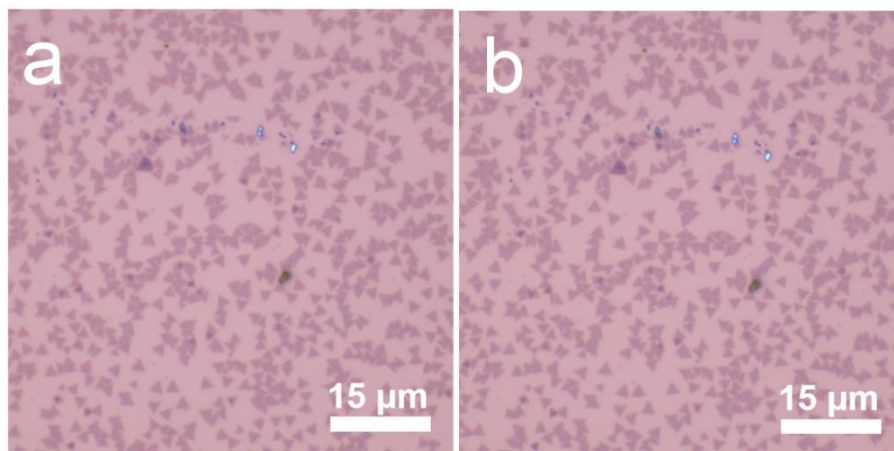

**Figure S1.** Optical images of the MoS<sub>2</sub>/SiO<sub>2</sub>/Si before (a) and after (b) BN growth at 500 °C under  $T_{AB} = 70$  °C for 20 min. There is no color contrast difference between the samples before and after BN growth suggesting that no film has been deposited on the MoS<sub>2</sub> or the SiO<sub>2</sub>/Si substrate.

## S2. Growth of BN capping layer on MoS<sub>2</sub>/SiO<sub>2</sub>/Si at 800°C.

As shown in Figure S2, the Raman spectrum of the MoS<sub>2</sub> disappears after BN capping at 800°C, suggesting the degradation of MoS<sub>2</sub> during BN growth. On the other hand, the BN film shows clear  $E_{2g}$  mode from the B-N vibration at 1370 cm<sup>-1</sup>, indicating the formation of high-quality *h*-BN film. Therefore, higher  $T_{\text{growth}}$  yields BN film with high quality, but causes harm to the underneath 2D materials.

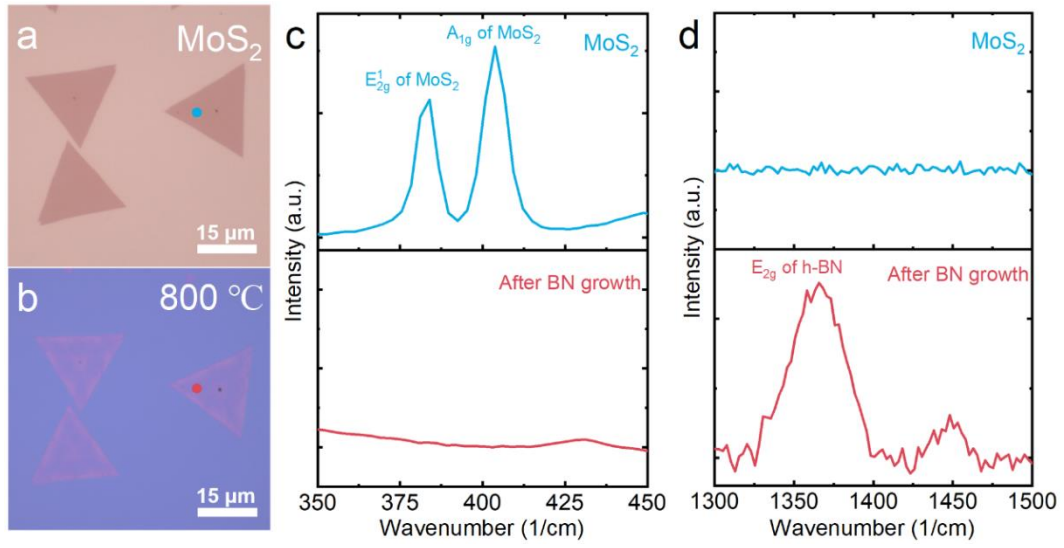

**Figure S2.** (a, b) Optical images of MoS<sub>2</sub> before (a) and after (b) BN growth at 800 °C for 20 min under  $T_{\text{AB}} = 110$  °C. (c) Raman spectra of MoS<sub>2</sub> before and after BN growth. (d) Raman spectra of BN before and after growth.

### S3. The effect of the amount of AB supply on the growth of BN on 2DMs at low temperature.

With low AB supply ( $M_{AB} < 5$  mg), no BN film could be formed on both the SiO<sub>2</sub>/Si substrate and the MoS<sub>2</sub>. Figure S3a shows the optical image of MoS<sub>2</sub>/SiO<sub>2</sub>/Si after BN growth at 500°C under 2 mg AB for 20 min. As shown in Figure S3b, no BN film is formed on the substrate or the MoS<sub>2</sub> domain, which is evidenced by the disappearance of the MoS<sub>2</sub> domains after Raman scanning (5 mW).

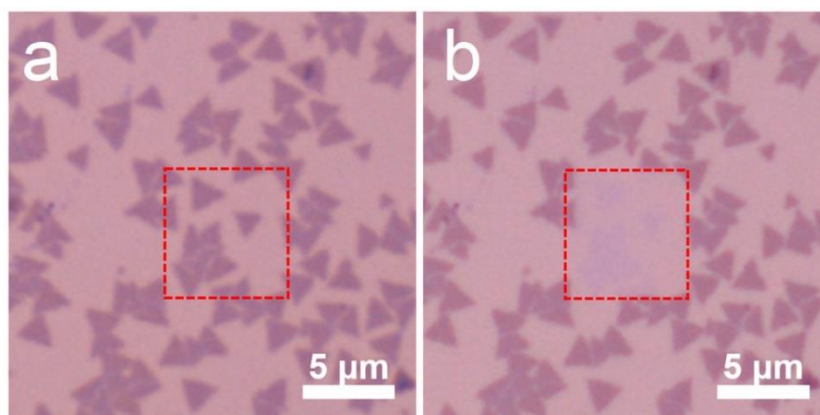

**Figure S3.** (a) Optical image of MoS<sub>2</sub> after BN growth at 500 °C with 2 mg AB. (b) Optical image of MoS<sub>2</sub> after laser area scanning with 10 mW for 10s at each 60 points (6×6 μm). Red dashed square marks the area of laser scanning.

Figure S4 a-c illustrate the thickness of BN on the SiO<sub>2</sub>/Si substrate under various  $M_{AB} = 10, 20$  and 30 mg. It is clear that the mass of AB strongly affects the thickness of the BN capping layer.

With high AB supply ( $M_{AB} > 15$  mg), BN forms directly on top of both the SiO<sub>2</sub>/Si substrate and the MoS<sub>2</sub>, forming the vertical BN/MoS<sub>2</sub> heterostructure. Figure S4 a-c show the result of BN growth under  $M_{AB} = 20$  mg for 20 min on MoS<sub>2</sub>/SiO<sub>2</sub>/Si substrate. BN film is deposited on the entire MoS<sub>2</sub>/SiO<sub>2</sub>/Si sample. The thickness difference measured from AFM in Figure S4 c is ~ 4.58 nm, in consistent with the value obtained under  $M_{AB} = 30$  mg (See Figure 1g in the main text).

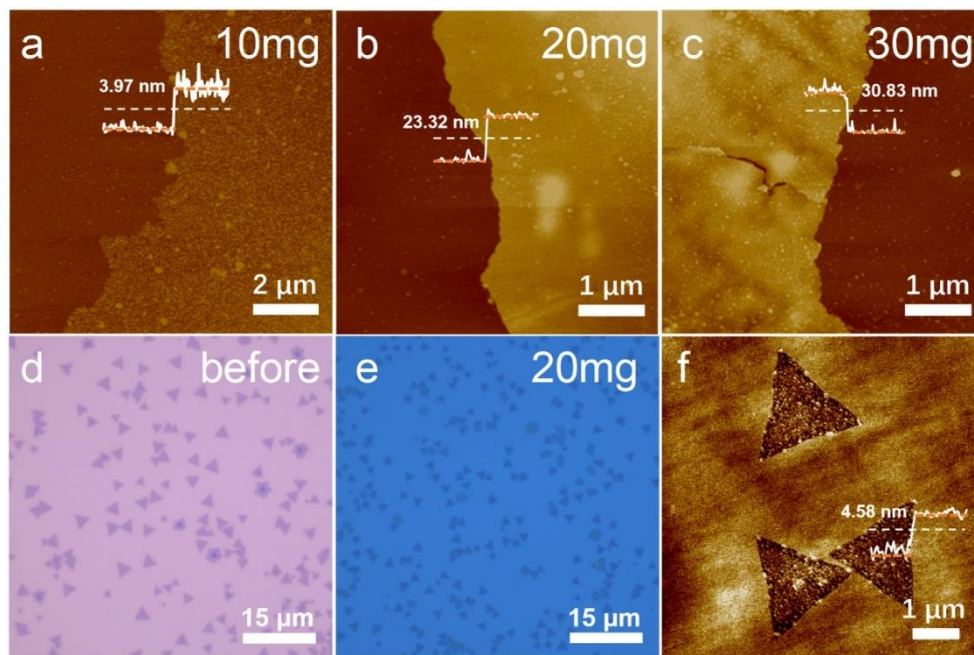

**Figure S4** (a-c) AFM images of the BN capping layer grown under various  $M_{AB}$ . The thickness shows the BN layer on the SiO<sub>2</sub>/Si substrate. (d, e) Optical images of MoS<sub>2</sub> before and after BN capping layer growth under  $M_{AB} = 20$  mg at 500 °C. (f) AFM image of BN/MoS<sub>2</sub> grown at  $M_{AB} = 20$  mg shows the height difference of  $\sim 4.58$  nm, and the BN thickness difference is thus  $\sim 3.78$  nm.

#### S4. The growth of BN on SiO<sub>2</sub>/Si and MoS<sub>2</sub>/SiO<sub>2</sub>/Si.

A schematic diagram is shown in Figure S5 to clearly demonstrate the evolution of thickness difference of BN on SiO<sub>2</sub> and MoS<sub>2</sub>. At the very beginning, the growth rate of BN on SiO<sub>2</sub> surface ( $v_{SiO_2}$ ) is higher than MoS<sub>2</sub> ( $v_{MoS_2}$ ) leading to the initial thickness difference of BN film on the two surfaces (Figure S5 a). After the BN film fully-covered the surface of both SiO<sub>2</sub> and MoS<sub>2</sub>, BN starts to grow on BN/SiO<sub>2</sub> and BN/MoS<sub>2</sub> (Figure S5 b). At this stage, the growth rate of BN on BN/SiO<sub>2</sub> surface ( $v_{BN}$ ) is still higher than BN/MoS<sub>2</sub> ( $v_{MoS_2}$ ). With the increasing of BN thickness, the influence from the substrate gradually weakens. At certain critical thickness ( $T_{critical}$ , marked in yellow in Figure S5b), the influence from the MoS<sub>2</sub> as well as the SiO<sub>2</sub> is negligible. As shown in Figure S5 c and d, the growth rate of BN on BN/SiO<sub>2</sub> ( $v_{BN}$ ) is now the same as the value on BN/MoS<sub>2</sub> ( $v_{BN}$ ), thereby the thickness difference becomes a constant value ( $H_{Fixed}$ ). The screening effect of BN with certain thickness ( $T_{critical}$ ) to isolate the influence from the substrate is similar to the previous study that  $\sim 3$  nm BN could screen the catalytic effect of the Cu substrate<sup>1</sup>.

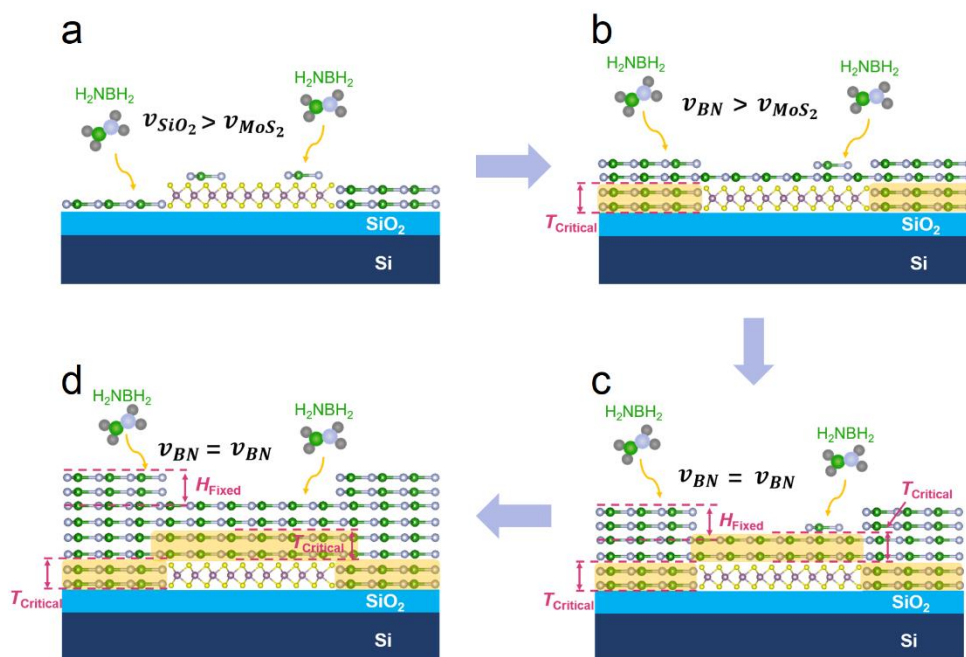

**Figure S5** Schematic diagram of the thickness evolution of BN growth on SiO<sub>2</sub>/Si and MoS<sub>2</sub>/SiO<sub>2</sub>/Si. (a) The initial growth rate of BN on SiO<sub>2</sub> surface ( $v_{SiO_2}$ ) is higher than MoS<sub>2</sub> ( $v_{MoS_2}$ ), i.e.  $v_{SiO_2} > v_{MoS_2}$ . (b) At certain critical thickness ( $T_{critical}$ , marked in yellow), the influence from the SiO<sub>2</sub> is negligible, and the growth rate of BN on BN/SiO<sub>2</sub> surface ( $v_{BN}$ ) is still higher than  $v_{MoS_2}$ . (c) After the thickness of BN on BN/MoS<sub>2</sub> reaches  $T_{critical}$ , the growth rate of BN on BN/SiO<sub>2</sub> ( $v_{BN}$ ) is now the same as the value on BN/MoS<sub>2</sub> ( $v_{BN}$ ), thereby the thickness difference becomes a constant value ( $H_{Fixed}$ ). (d) With the increasing of BN thickness,  $H_{Fixed}$  maintains constant.

## S5. Characterization of BN film by TEM and ATR-FTIR.

The BN films grown on SiO<sub>2</sub>/Si surface was further transferred to copper grid by polymethyl methacrylate (PMMA) assisted wet transfer technique for TEM study. The SiO<sub>2</sub> was etched away in 1 mol/L NaOH at 60°C. The PMMA/BN film was then rinsed in deionized water for several min to further remove the residual solvent. Finally, PMMA was removed by acetone.

Before characterize BN film by attenuated total reflectance Fourier transform infrared (ATR-FTIR) spectrometer, BN film obtained on SiO<sub>2</sub>/Si was transferred to copper foil by the same transfer method. Cu foil was applied to eliminate the strong absorption signals from the SiO<sub>2</sub> substrate in the infrared spectral region.

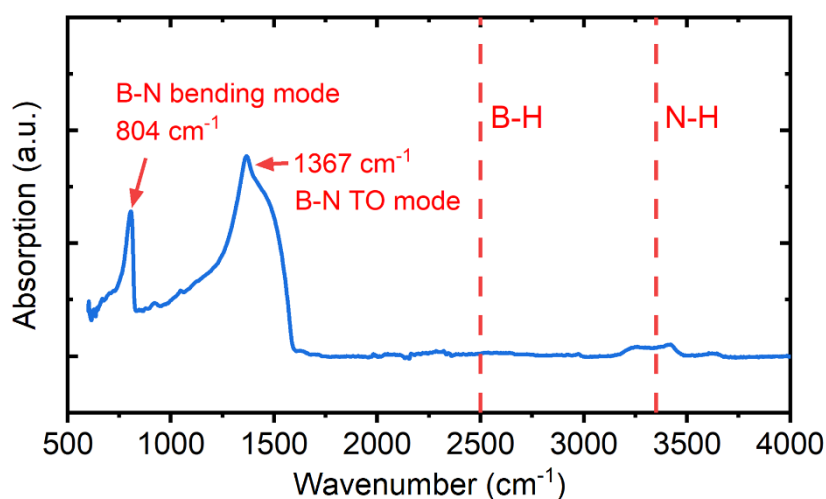

**Figure S6** ATR-FTIR spectrum of the low-temperature grown BN film.

## S6. Performance of BN/MoS<sub>2</sub> FET.

The optical images of MoS<sub>2</sub> FETs before and after BN capping are shown in Figure S5 a-b. The transfer and the output characteristic of MoS<sub>2</sub> FET before and after BN capping are illustrated in Figure S5 c-f. The field effect mobilities are calculated to be 0.038 cm<sup>2</sup>V<sup>-1</sup>s<sup>-1</sup> and 0.115 cm<sup>2</sup>V<sup>-1</sup>s<sup>-1</sup> ( $L = 10.75\ \mu\text{m}$ ,  $W = 8.15\ \mu\text{m}$ ) before and after BN capping.

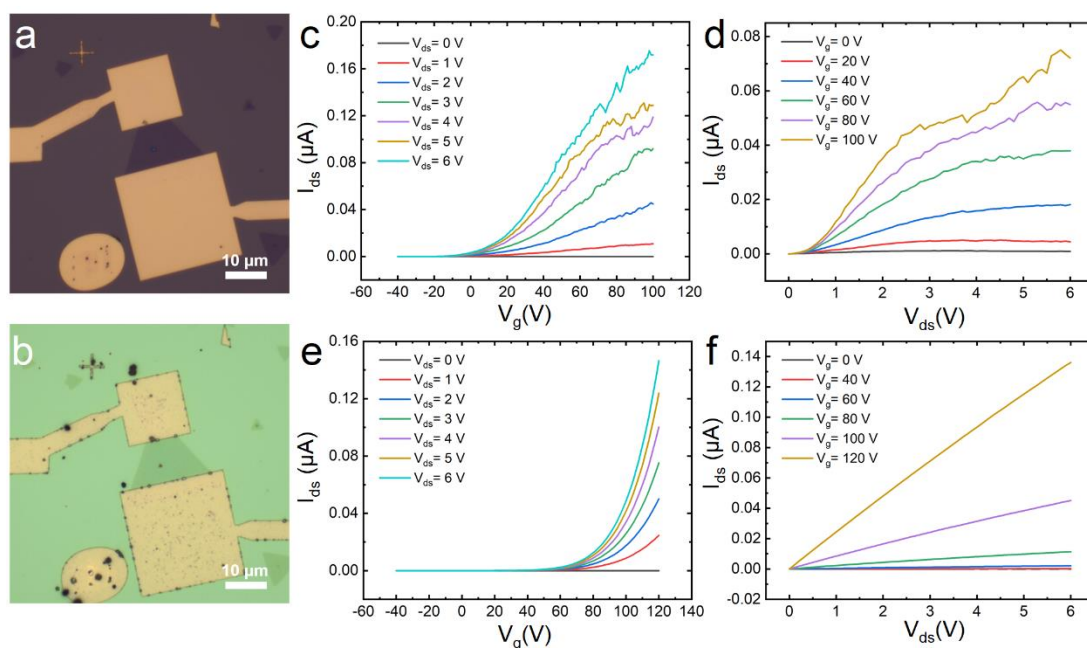

**Figure S7** (a-b) Optical images of the MoS<sub>2</sub> FETs before (a) and after (b) BN capping. (c-d) Transfer and output characteristic curves of the MoS<sub>2</sub> FET before BN capping. (e-f) Transfer and output characteristic curves of the MoS<sub>2</sub> FET after BN capping.

## Reference

(1) Wang, M.; Kim, M.; Odkhuu, D.; Park, N.; Lee, J.; Jang, W.-J.; Kahng, S.-J.; Ruoff, R. S.; Song, Y. J.; Lee, S., Catalytic Transparency of Hexagonal Boron Nitride on Copper for Chemical Vapor Deposition Growth of Large-Area and High-Quality Graphene. *ACS Nano* **2014**, 8 (6), 5478-5483.
